# Supplementary material
Source: PubMed Central journal article supplement (PMC6275498)
Supplement: pnas.1813849115.sapp.pdf [file pnas.1813849115.sapp.pdf]

# Supplementary Information for

## Mechanism of Selective Benzene Hydroxylation Catalyzed by Iron-Containing Zeolites

Benjamin E. R. Snyder<sup>a,†</sup>, Max L. Bols<sup>b</sup>, Hannah M. Rhoda<sup>a</sup>, Pieter Vanelderen<sup>a,b</sup>, Lars H. Böttger<sup>a</sup>, Augustin Braun<sup>a</sup>, James J. Yan<sup>a</sup>, Ryan G. Hadt<sup>a,‡</sup>, Jeffrey T. Babicz, Jr.<sup>a</sup>, Michael Y. Hu<sup>c</sup>, Jiyong Zhao<sup>c</sup>, E. Ercan Alp<sup>c</sup>, Britt Hedman<sup>d</sup>, Keith O. Hodgson<sup>a,d</sup>, Robert A. Schoonheydt<sup>b,\*</sup>, Bert F. Sels<sup>b,\*</sup>, and Edward I. Solomon<sup>a,d,\*</sup>

<sup>a</sup>Department of Chemistry, Stanford University, Stanford, California 94305, United States

<sup>b</sup>Department of Microbial and Molecular Systems, Centre for Surface Chemistry and Catalysis, KU Leuven – University of Leuven, Celestijnenlaan 200F, B-3001 Leuven, Belgium.

<sup>c</sup>Advanced Photon Source, Argonne National Laboratory, Argonne, IL 60439

<sup>d</sup>Stanford Synchrotron Radiation Lightsource, SLAC National Accelerator Laboratory, Stanford University, Menlo Park, CA 94025

<sup>†</sup>Current address: Department of Chemistry, University of California, Berkeley, California 94720, United States.

<sup>‡</sup>Current address: Division of Chemistry and Chemical Engineering, California Institute of Technology, Pasadena, California 91125, United States.

Robert A. Schoonheydt: robert.schoonheydt@kuleuven.be

Bert F. Sels: bert.sels@kuleuven.be

Edward I. Solomon: solomone@stanford.edu

### This PDF file includes:

SI Methods

SI References

Figs. S1 to S10

Tables S1 to S6

## SI Methods

**Preparation of Fe-zeolites.** Samples of Fe-BEA (Si/Al=12.5) and Fe-ZSM-5 (Si/Al=15) were prepared from the corresponding acid zeolites by diffusion impregnation of  $\text{Fe}(\text{acac})_3$  (acac = acetylacetonate) in toluene solution (2.5 mM; 25 ml/g zeolite), resulting in Fe loadings of  $\sim 0.3$  wt%.  $^{57}\text{Fe}$ -enriched Fe-zeolites were synthesized similarly using 100%  $^{57}\text{Fe}(\text{acac})_3$ . After Fe impregnation, all samples were calcined in air at 550 °C to remove organic material. This preparation method maximizes Fe homogeneity and limits the formation of oxide/hydroxide species.<sup>1</sup> Samples were then subjected to a high-temperature treatment at 900 °C in He (20 cm<sup>3</sup>/min) for 2 hours, followed by a reductive treatment in H<sub>2</sub> at 700 °C for 1 hour (20 cm<sup>3</sup>/min). All subsequent manipulations were carried out under an inert atmosphere (either nitrogen or helium). All sample treatment procedures and reactions were carried out in a quartz reactor containing a 2.4 cm<sup>3</sup> bed of pelletized zeolite (250-500 μm), corresponding to 0.8 g of material. N<sub>2</sub>O activation of reduced Fe(II)-BEA and Fe(II)-ZSM-5 was performed at 160 °C using a 5 vol% N<sub>2</sub>O/He flow (20 cm<sup>3</sup>/min). For Fe-ZSM-5, labeled  $\alpha$ -<sup>18</sup>O was prepared by treating a sample of N<sub>2</sub>O-activated Fe-ZSM-5 in an atmosphere of pure <sup>18</sup>O<sub>2</sub> at 100 °C for 30 hours. A typical sample of N<sub>2</sub>O-activated Fe-BEA (0.3 wt% Fe, Si/Al = 12) contains  $\sim 40$  μmol  $\alpha$ -O per gram of catalyst ( $\sim 80\%$  of total Fe content). The C<sub>6</sub>H<sub>6</sub> reaction was performed at room temperature using a flow He gas saturated with C<sub>6</sub>H<sub>6</sub> vapor (20 cm<sup>3</sup>/min).

**Diffuse reflectance spectroscopy.** DR-UV-vis spectra were recorded on a Varian Cary 5000 UV–VIS–NIR spectrophotometer at room temperature against a halon white reflectance standard. All treatments before the in situ UV-vis-NIR spectroscopic measurements were performed in a quartz U-tube/flow cell. The latter was equipped with a window for in situ UV-vis-NIR diffuse reflectance spectroscopy. After UV-vis measurements, the catalyst pellets were mounted in the quartz side arm of the U-tube, ensuring that the conditions for UV-vis-NIR and other spectroscopic measurements were identical.

**Mössbauer spectroscopy.**  $^{57}\text{Fe}$  Mössbauer spectra were recorded with a See Co. W302 resonant gamma ray spectrometer in horizontal geometry with zero external field using a 1.85 GBq source (Be window, Rh matrix). Data were collected from samples enriched with 100%  $^{57}\text{Fe}$ . Spectra were recorded at 6K, and isomer shifts are given relative to  $\alpha\text{-Fe}_2\text{O}_3$  foil at room temperature. Spectra were collected with 1,024 points and summed up to 256 points before analyzing, and then fit with Lorentzian doublets using the Vinda software package for Microsoft Excel.<sup>2</sup>

**MCD and VTVH-MCD spectroscopy.** Cells for MCD spectroscopy were prepared under an inert nitrogen atmosphere. Mull samples with suitable transparency were prepared using dried and degassed perfluoro-2-methylpentane as the mulling agent. Mulls were frozen using liquid nitrogen immediately after preparation. MCD data were collected using a Jasco J730 spectropolarimeter with a liquid nitrogen cooled InSb

detector coupled to an Oxford Instruments SM4000-7T superconducting magnet. MCD spectra were background corrected for baseline effects using data collected at 0 T. VTVH-MCD data were collected using a calibrated Cernox temperature sensor (Lakeshore Cryotronics, calibrated to 1.5–300 K with 0.001 K tolerance) inserted directly into the sample cell. Isotherms/isofields were normalized to the maximum observed intensity. Spin Hamiltonian parameters were extracted from VTVH-MCD isotherms using established procedures.<sup>3</sup>

**XAS spectroscopy.** XAS cells (2 mm x 10 mm capped-type Delrin cells wrapped with Kapton tape) were loaded under an inert N<sub>2</sub> atmosphere with zeolite powder suspended in perfluoro-2-methylpentane, and then frozen under liquid nitrogen. The samples were oriented at 45° to the incident X-ray beam and maintained at 10 K using an Oxford Instruments CF1208 continuous flow liquid helium cryostat. XAS data were collected at beamlines 7-3 and 9-3 at the SSRL under ring operating conditions of 500 mA over an energy range of 6,785–7,876 eV ( $k=14 \text{ \AA}^{-1}$ ). Fluorescence data were collected at 90° to the incident beam using a solid-state 30- or 100-element Ge detector array with Soller slits and a six-wavelength Mn filter aligned between the detector and the sample to improve the Fe K $\alpha$  fluorescence signal intensity relative to that of the scattered beam.<sup>4</sup> An internal calibration was utilized with the first inflection point of an Fe foil set to 7,111.2 eV.<sup>5</sup> During measurement, the data in the Fe K-edge, K pre-edge, and EXAFS regions were continuously monitored to ensure sample integrity by comparing each individual scan to ones taken previously. To minimize photodamage, different spots

were scanned along the samples and averaged, and only the first scan on each spot was included in the reported data.

Data reduction, background subtraction, and normalization were performed according to established methods<sup>6-8</sup> using the program PySpline<sup>9</sup> with the data normalized to a value of 1.0 at 7,130.0 eV. The spline function through the EXAFS region was chosen to minimize any residual low-frequency background but not reduce the EXAFS amplitude, as monitored by the Fourier transform intensity. Normalization of the EXAFS data was accomplished using a third-order postedge polynomial background fit over the full data range ( $k=14 \text{ \AA}^{-1}$ ) and a three-segment (four-knot) spline.

EXAFS signals were calculated using FEFF (version 7.0), and the data were fit using the program OPT as part of EXAFSPAK.<sup>10</sup> In all fits the bond lengths (R) and bond variances ( $\sigma^2$ ) were allowed to vary. The threshold energy ( $k=0$ ,  $E_0$ ) was also allowed to vary but was constrained as a common variable ( $\Delta E_0$ ) for all fit paths in a given dataset. The amplitude reduction factors ( $S_0^2$ ) were fixed to a value of 1.0, and the coordination numbers (CN) were varied systematically based on a structural model to achieve the best fit to the EXAFS data. The best choice of all available FEFF paths and the goodness of the overall fit were optimized based on a combination of weighted F-factor (F) as well as visual fit to the EXAFS data and their Fourier transform. On the basis of studies of complexes of known structures, the uncertainties in final distances are within 0.02  $\text{\AA}$ .<sup>11</sup> The EXAFS data were fit using DFT structures in figure S3.

**NRVS spectroscopy.** NRVS spectra were collected at the APS in Argonne, at beamline 3-ID-D. NRVS scans were acquired in 8–15 scans at 1 h per scan. Energy calibration was performed using an  $[\text{FeCl}_4]^-$  standard.<sup>12</sup> NRVS cells (Delrin, covered with Kapton tape) were loaded under an inert  $\text{N}_2$  atmosphere with zeolite powder suspended in perfluoro-2-methylpentane, and then frozen under liquid nitrogen. Samples were loaded from liquid nitrogen into a precooled cryostat, ensuring the cryostat temperature remained below 140 K. Samples were measured in a grazing angle of  $4^\circ$ . The cryostat temperature was held at 10–15 K, whereas the actual sample temperature (between 90–110 K) was determined using the detailed balance relationship between Stokes/anti-Stokes spectral intensity.<sup>13</sup> The phoenix 2.1.4 software package<sup>14,15</sup> was used to add the scans, subtract the resonant peak, correct for background counts, and convert the resulting spectra to a partial density of states.<sup>16</sup>

**DFT calculations.** Cluster models were generated from crystallographic coordinates of BEA polymorph A, as outlined in refs 1 and 17, but only including T-sites directly connected to the  $\beta$ -6MR ligand, and with capping hydrides at 1.42 Å instead of capping hydroxyls to reduce computation times (see Supplementary Tables 1–6 for coordinates). Spin-unrestricted DFT calculations were performed with Gaussian 09 (revision D.01)<sup>18</sup> using the B3LYP functional. The 6-311G\* basis set was used for Fe, for atoms directly coordinated to Fe, and for  $\text{C}_6\text{H}_6$ . The 6-31G\* basis set was used for all other atoms. For geometry optimizations, the six T-sites of the  $\beta$ -6MR ligand were allowed to relax, and all other atoms were frozen at their crystallographic positions. For the  $\text{C}_6\text{H}_6$  reaction

coordinate, all transition states were verified to contain a single imaginary frequency corresponding to motion along the reaction coordinate. Intrinsic reaction coordinate calculations were performed to further verify that each transition state connects the appropriate reactants and products. Mössbauer quadrupole splittings were calculated using the B3LYP functional, with the TZVP basis set on Fe and coordinating O atoms, and 6-31G\* on all other atoms. Mössbauer isomer shifts were calculated with the ORCA computational package (version 303)<sup>19</sup> using the B3LYP functional. The CP(PPP) basis set was used on Fe, with 6-311G\* on coordinating O atoms and 6-31G\* on all others. A calibration curve was generated by relating the DFT-calculated electron densities at the iron nucleus  $|\psi_0|^2$  values to the experimental isomer shifts for a test set of 23 structurally defined Fe complexes.<sup>1</sup> The IS values of the cluster models were then estimated from the value of  $|\psi_0|^2$  calculated for each cluster model. NRVS spectra were simulated using larger cluster models constructed according to procedures outlined in ref 17. NRVS spectra were generated from frequency calculations using the `gennrvs` script.

**Quantitation of Fe(III) Poisoned Sites.** In Fe-BEA, the intensity of the Fe(III)-phenolate charge transfer is double that of the  $15,900\text{ cm}^{-1}$   $d_{z^2} \rightarrow d_{x^2-y^2}$  ligand field transition of  $\alpha$ -Fe(II). This intensity ratio can be used to estimate the ratio of phenolate poisoned sites. This requires reasonable estimates of molar extinction coefficients for the absorption features of interest. Studies of structurally defined model complexes define typical values of  $\epsilon=3000\text{-}6000\text{ M}^{-1}\text{cm}^{-1}$  for  $S=5/2$  Fe(III)-phenolate charge

transfers<sup>20-23</sup> and  $\epsilon=10-93 \text{ M}^{-1}\text{cm}^{-1}$  for S=2 square planar Fe(II)  $d_{z^2}\rightarrow d_{x^2-y^2}$  ligand field bands.<sup>24-27</sup> Assuming an  $\epsilon=10 \text{ M}^{-1}\text{cm}^{-1}$  for the  $\alpha$ -Fe(II)  $d_{z^2}\rightarrow d_{x^2-y^2}$  transition and an  $\epsilon=6000 \text{ M}^{-1}\text{cm}^{-1}$  for the Fe(III)-phenolate charge transfer provides a conservative lower bound for site poisoning of 0.2%, while Mössbauer data set an upper limit of 5%.

**Activation of  $\alpha$ -O for aromatic hydroxylation.** Past studies have identified two contributions to the activation of  $\alpha$ -O for electrophilic chemistry.<sup>1,17</sup> First, there is an unusually large Fe(IV)/Fe(III) reduction enthalpy. This derives from the vacant *trans* axial position and S=2 electronic structure of  $\alpha$ -O, both of which stabilize the redox-active  $\alpha$ - $d_{z^2}$ -derived molecular orbital. In aromatic hydroxylation, this leads to a large enthalpic driving force for C-O bond formation ( $\Delta H=-15.5 \text{ kcal/mol}$  from figure 4, versus ca.  $+5 \text{ kcal/mol}$  for other Fe(IV)=O intermediates). As shown in figure S10, the driving force is diminished by  $\sim 10 \text{ kcal/mol}$  on the triplet surface. This leads to a small activation barrier for C-O bond formation of  $\Delta E^\ddagger=2.3 \text{ kcal/mol}$  – significantly lower than those predicted for other Fe(IV)=O intermediates (ca.  $15 \text{ kcal/mol}$ ).<sup>28,29</sup> For  $\alpha$ -O, C-O bond formation is almost thermoneutral, and the small  $\Delta E^\ddagger$  therefore reflects the high intrinsic reactivity of the Fe=O core of  $\alpha$ -O. From experiment, this Fe=O core is unusually covalent, with the highest Fe(IV)=O stretching frequency yet defined ( $885 \text{ cm}^{-1}$ ).<sup>17</sup> This makes a second important contribution to lowering activating  $\alpha$ -O for aromatic hydroxylation: DFT calculations show high Fe=O covalency results in an  $\alpha$ - $d_{z^2}$ -derived reactive FMO with  $\sim 50\%$  oxo 2p content<sup>1,17</sup> that is an efficient acceptor orbital for electrophilic attack on  $\text{C}_6\text{H}_6$ .<sup>30</sup>



**Evaluation of reaction mechanisms.** Starting from the  $\sigma$ -complex in figure 4, three potential reaction mechanisms to form Fe(II) products were evaluated. The associated intramolecular H/D KIEs were estimated by comparing the two possible  $\sigma$ -complexes formed from benzene-1,3,5-d<sub>3</sub>. Values of  $\alpha$  were estimated using the Eyring model ( $\alpha = \exp(-\Delta\Delta H^\ddagger/RT)$ ). In these calculations, the effective temperature was adjusted to 800-2300 K to account for  $2.5 \pm 1.5$  kcal/mol of free energy released during C-O bond formation. For the NIH shift discussed in the main text, the H/D  $\Delta\Delta H^\ddagger = +0.23$  kcal/mol combined with an effective temperature of 800-2300 K results in a predicted  $\alpha = 1.05$ -1.16. This assumes an equilibrium between free benzene and the  $\sigma$ -complex. However if  $\sigma$ -complex formation is irreversible and barrier-less, this would result in an intramolecular KIE of unity. There is an H/D  $\Delta\Delta H^\ddagger = +1.69$  kcal/mol predicted for homolysis of the ipso C-H bond of the  $\sigma$ -complex to form the Fe(III)-phenolate poisoned site. This correlates to a predicted  $\alpha = 1.44$ -2.89 (again, assuming an effective temperature of 800-2300 K). A second potential reaction mechanism involves transferring the ipso proton to the oxygen, directly forming the phenol ligated active site (intermediate 5 in figure 4). The barrier for this reaction is much higher than for the NIH shift ( $\Delta\Delta H^\ddagger = 14.4$  kcal/mol). A third mechanism would involve transfer of the ipso proton to the lattice, directly forming intermediate 4. However attempts to locate the associated transition state instead yielded the NIH shift transition state.

## SI References

- (1) Snyder, B. E. R.; Vanelderen, P.; Bols, M. L.; Hallaert, S. D.; Böttger, L. H.; Ungur, L.; Pierloot, K.; Schoonheydt, R. A.; Sels, B. F.; Solomon, E. I. The Active Site of Low-Temperature Methane Hydroxylation in Iron-Containing Zeolites. *Nature* **2016**, *536*, 317–321.
- (2) Gunnlaugsson, H. P. Spreadsheet Based Analysis of Mössbauer Spectra. *Hyperfine Interact.* **2016**, *237*, 79.
- (3) Solomon, E. I.; Pavel, E. G.; Loeb, K. E.; Campochiaro, C. Magnetic Circular Dichroism Spectroscopy as a Probe of the Geometric and Electronic Structure of Non-Heme Ferrous Enzymes. *Coord. Chem. Rev.* **1995**, *144*, 369–460.
- (4) Cramer, S. P.; Tench, O.; Yocum, M.; George, G. N. A 13-Element Ge Detector for Fluorescence EXAFS. *Nucl. Instruments Methods Phys. Res. Sect. A Accel. Spectrometers, Detect. Assoc. Equip.* **1988**, *266*, 586–591.
- (5) Scott, R. A.; Hahn, J. E.; Doniach, S.; Freeman, H. C.; Hodgson, K. O. Polarized X-Ray Absorption Spectra of Oriented Plastocyanin Single Crystals. Investigation of Methionine-Copper Coordination. *J. Am. Chem. Soc.* **1982**, *104*, 5364–5369.
- (6) Scott, R. A. [23] Measurement of Metal-Ligand Distances by EXAFS. *Methods Enzymol.* **1985**, *117*, 414–459.
- (7) DeWitt, J. G.; Bentsen, J. G.; Rosenzweig, A. C.; Hedman, B.; Green, J.; Pilkington, S.; Papaefthymiou, G. C.; Dalton, H.; Hodgson, K. O.; Lippard, S. J. X-Ray Absorption, Mössbauer, and EPR Studies of the Dinuclear Iron Center in the Hydroxylase Component of Methane Monooxygenase. *J. Am. Chem. Soc.* **1991**,

- 113, 9219–9235.
- (8) Cramer, S. P.; Hodgson, K. O. X-Ray Absorption Spectroscopy: A New Structural Method and Its Applications to Bioinorganic Chemistry. *Prog. Inorg. Chem.* **1979**, *25*, 1–39.
- (9) Tenderholt, A.; Hedman, B.; Hodgson, K. O. PySpline: A Modern, Cross-Platform Program for the Processing of Raw Averaged XAS Edge and EXAFS Data. In *13th International Conference on X-ray Absorption Fine Structure - XAFS13*; Hedman, B., Pianetta, P., Eds.; American Institute of Physics Conference Proceedings: Melville, New York, 2007; Vol. 882, pp 105–107.
- (10) George, G. N.; Pickering, I. EXAFSPAK & EDG\_FIT. Stanford Synchrotron Radiation Laboratory, Stanford Linear Accelerator Center, Stanford University: Stanford, CA 2000.
- (11) Cramer, S. P.; Hodgson, K. O.; Stiefel, E. I.; Newton, W. E. A Systematic X-Ray Absorption Study of Molybdenum Complexes. The Accuracy of Structural Information from Extended X-Ray Absorption Fine Structure. *J. Am. Chem. Soc.* **1978**, *100*, 2748–2761.
- (12) Smith, M. C.; Xiao, Y.; Wang, H.; George, S. J.; Coucouvanis, D.; Koutmos, M.; Sturhahn, W.; Alp, E. E.; Zhao, J.; Cramer, S. P. Normal-Mode Analysis of FeCl<sub>4</sub><sup>-</sup> and Fe<sub>2</sub>S<sub>2</sub>Cl<sub>4</sub><sup>2-</sup> via Vibrational Mössbauer, Resonance Raman, and FT-IR Spectroscopies. *Inorg. Chem.* **2005**, *44*, 5562–5570.
- (13) Zhao, J. Y.; Sturhahn, W. High-Energy-Resolution X-Ray Monochromator Calibration Using the Detailed-Balance Principle. *J. Synchrotron Radiat.* **2012**, *19*,

- 602–608.
- (14) Sturhahn, W. CONUSS and PHOENIX: Evaluation of Nuclear Resonant Scattering Data. *Hyperfine Interact.* **2000**, *125*, 149–172.
- (15) Sturhahn, W. NRIXS Software. <http://www.nrixs.com> 2017.
- (16) Sturhahn, W.; Toellner, T. S.; Alp, E. E.; Zhang, X.; Ando, M.; Yoda, Y.; Kikuta, S.; Seto, M.; Kimball, C. W.; Dabrowski, B. Phonon Density of States Measured by Inelastic Nuclear Resonant Scattering. *Phys. Rev. Lett.* **1995**, *74*, 3832.
- (17) Snyder, B. E. R.; Böttger, L. H.; Bols, M. L.; Yan, J. J.; Rhoda, H. M.; Jacobs, A. B.; Hu, M. Y.; Zhao, J.; Alp, E. E.; Hedman, B.; et al. Structural Characterization of a Non-Heme Iron Active Site in Zeolites That Hydroxylates Methane. *Proc. Natl. Acad. Sci.* **2018**, *115*, 4565–4570.
- (18) Frisch, M. J.; Trucks, G. W.; Schlegel, H. B.; Scuseria, G. E.; Robb, M. A.; Cheeseman, J. R.; Scalmani, G.; Barone, V.; Mennucci, B.; Petersson, G. A.; et al. Gaussian09. Gaussian, Inc.: Wallingford, CT 2009.
- (19) Frank, N. The ORCA Program System. *Wiley Interdiscip. Rev. Comput. Mol. Sci.* **2011**, *2*, 73–78.
- (20) Carrano, C. J.; Carrano, M. W.; Sharma, K.; Backes, G.; Sanders-Loehr, J. Resonance Raman Spectra of High- and Low-Spin Ferric Phenolates. Models for Dioxygenases and Nitrile Hydratase. *Inorg. Chem.* **1990**, *29*, 1865–1870.
- (21) Bailey, N. A.; Cummins, D.; McKenzie, E. D.; Worthington, J. M. Iron(III) Compounds of Phenolic Ligands. The Crystal and Molecular Structure of iron(III) Compounds of the Sexadentate Ligand N,N'-Ethylene-Bis-(O-

- Hydroxyphenylglycine). *Inorganica Chim. Acta* **1981**, *50*, 111–120.
- (22) Davies, J. E.; Gatehouse, B. M. The Crystal and Molecular Structure of Chlorobis- $\{\text{N}(\text{O}-\text{Hydroxyphenyl})\text{glycino}\}$ propylsalicylaldiminato)iron(III). *Acta Crystallogr. Sect. B* **1972**, *28*, 3641–3645.
- (23) Carrano, C. J.; Spartalian, K.; Rao, G. V. N. A.; Pecoraro, V. L.; Sundaralingam, M. The iron(III) Complex of N-[2-((O-Hydroxyphenyl)glycino)ethyl]salicylideneimine. A Model Complex for the iron(III) Environment in the Transferrins. *J. Am. Chem. Soc.* **1985**, *107*, 1651–1658.
- (24) Burns, R. G.; Clark, M. G.; Stone, A. J. Vibronic Polarization in the Electronic Spectra of Gillespite, a Mineral Containing Iron (II) in Square-Planar Coordination. *Inorg. Chem.* **1966**, *5*, 1268–1272.
- (25) Pinkert, D.; Demeshko, S.; Schax, F.; Braun, B.; Meyer, F.; Limberg, C. A Dinuclear Molecular Iron (II) Silicate with Two High-Spin Square-Planar FeO<sub>4</sub> Units. *Angew. Chemie Int. Ed.* **2013**, *52*, 5155–5158.
- (26) Pinkert, D.; Keck, M.; Tabrizi, S. G.; Herwig, C.; Beckmann, F.; Braun-Cula, B.; Kaupp, M.; Limberg, C. A High-Spin Square Planar Iron(ii)-Siloxide and Its Tetrahedral Allogon - Structural and Spectroscopic Models of Fe-Zeolite Sites. *Chem. Commun.* **2017**, *53*, 8081–8084.
- (27) Cantalupo, S. A.; Fiedler, S. R.; Shores, M. P.; Rheingold, A. L.; Doerrer, L. H. High-Spin Square-Planar Coll and Fell Complexes and Reasons for Their Electronic Structure. *Angew. Chemie Int. Ed.* **2012**, *51*, 1000–1005.
- (28) de Visser, S. P.; Oh, K.; Han, A.-R.; Nam, W. Combined Experimental and

- Theoretical Study on Aromatic Hydroxylation by Mononuclear Nonheme Iron (IV)–Oxo Complexes. *Inorg. Chem.* **2007**, *46*, 4632–4641.
- (29) Neidig, M. L.; Decker, A.; Choroba, O. W.; Huang, F.; Kavana, M.; Moran, G. R.; Spencer, J. B.; Solomon, E. I. Spectroscopic and Electronic Structure Studies of Aromatic Electrophilic Attack and Hydrogen-Atom Abstraction by Non-Heme Iron Enzymes. *Proc. Natl. Acad. Sci.* **2006**, *103*, 12966–12973.
- (30) Snyder, B. E. R.; Bols, M. L.; Schoonheydt, R. A.; Sels, B. F.; Solomon, E. I. Iron and Copper Active Sites in Zeolites and Their Correlation to Metalloenzymes. *Chem. Rev.* **2018**, *118*, 2718–2768.

## Supporting Figures

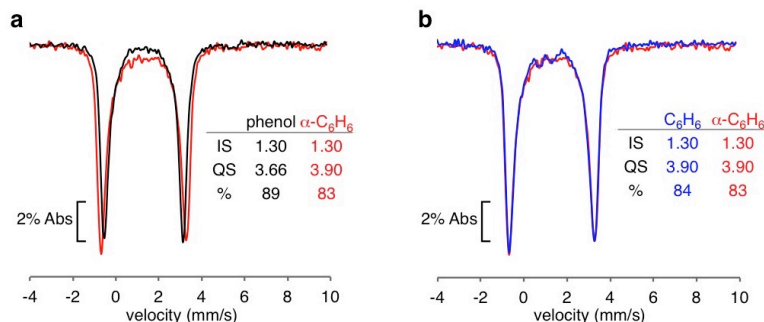

**Figure S1.** **a**, Comparison of 6K  $^{57}\text{Fe}$  Mössbauer spectra and parameters of  $\alpha$ -C<sub>6</sub>H<sub>6</sub> (the single turnover product – red trace) and phenol-ligated  $\alpha$ -Fe(II) (black trace). **b**, Comparison of data from  $\alpha$ -C<sub>6</sub>H<sub>6</sub> (red trace) with benzene-ligated  $\alpha$ -Fe(II) (blue trace).

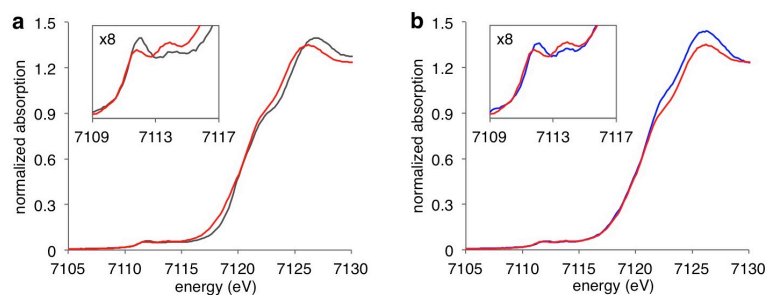

### c EXAFS fits

| scattering path                         | CN | $r$ (Å) | $\sigma^2$ (Å <sup>2</sup> ) | $\chi^2$ |
|-----------------------------------------|----|---------|------------------------------|----------|
| $\alpha$ -C <sub>6</sub> H <sub>6</sub> |    |         |                              |          |
| Fe-O                                    | 4  | 2.10    | 617                          |          |
| Fe-Al                                   | 2  | 2.92    | 420                          |          |
| Fe-Si                                   | 4  | 3.38    | 530                          |          |
| Fe-Ob                                   | 2  | 3.41    | 673                          |          |
| Fe-O                                    | 4  | 4.09    | 751                          |          |
| Fe-O                                    | 4  | 4.70    | 839                          |          |
| Fe-Si-O                                 | 4  | 3.57    | 261                          |          |
| $E_0 = -6.0169$                         |    |         |                              | 0.29     |
| $\alpha$ -Fe(II) + phenol               |    |         |                              |          |
| Fe-O                                    | 5  | 2.09    | 683                          |          |
| Fe-Al                                   | 2  | 2.90    | 444                          |          |
| Fe-Si                                   | 4  | 3.35    | 839                          |          |
| Fe-Ob                                   | 2  | 3.42    | 117                          |          |
| Fe-O                                    | 4  | 4.06    | 866                          |          |
| Fe-O                                    | 4  | 4.70    | 839                          |          |
| Fe-Si-O                                 | 4  | 3.54    | 154                          |          |
| $E_0 = -6.4206$                         |    |         |                              | 0.67     |
| $\alpha$ -Fe(II) + benzene              |    |         |                              |          |
| Fe-O                                    | 4  | 2.10    | 608                          |          |
| Fe-Al                                   | 2  | 2.92    | 377                          |          |
| Fe-Si                                   | 4  | 3.34    | 551                          |          |
| Fe-O                                    | 4  | 4.00    | 425                          |          |
| Fe-O                                    | 4  | 4.68    | 319                          |          |
| $E_0 = -7.3265$                         |    |         |                              | 0.74     |

**Figure S2.** **a**, Comparison of Fe K-edge XANES of  $\alpha$ -C<sub>6</sub>H<sub>6</sub> (red trace) and phenol-ligated  $\alpha$ -Fe(II) (black trace). The pre-edge region is shown in the inset. **b**, Comparison of data from  $\alpha$ -C<sub>6</sub>H<sub>6</sub> (red trace) and benzene-ligated  $\alpha$ -Fe(II) (blue trace). **c**, Full EXAFS fits of  $\alpha$ -C<sub>6</sub>H<sub>6</sub> (top), phenol-ligated  $\alpha$ -Fe(II) (middle), and benzene-ligated  $\alpha$ -Fe(II) (bottom). CN = coordination number.

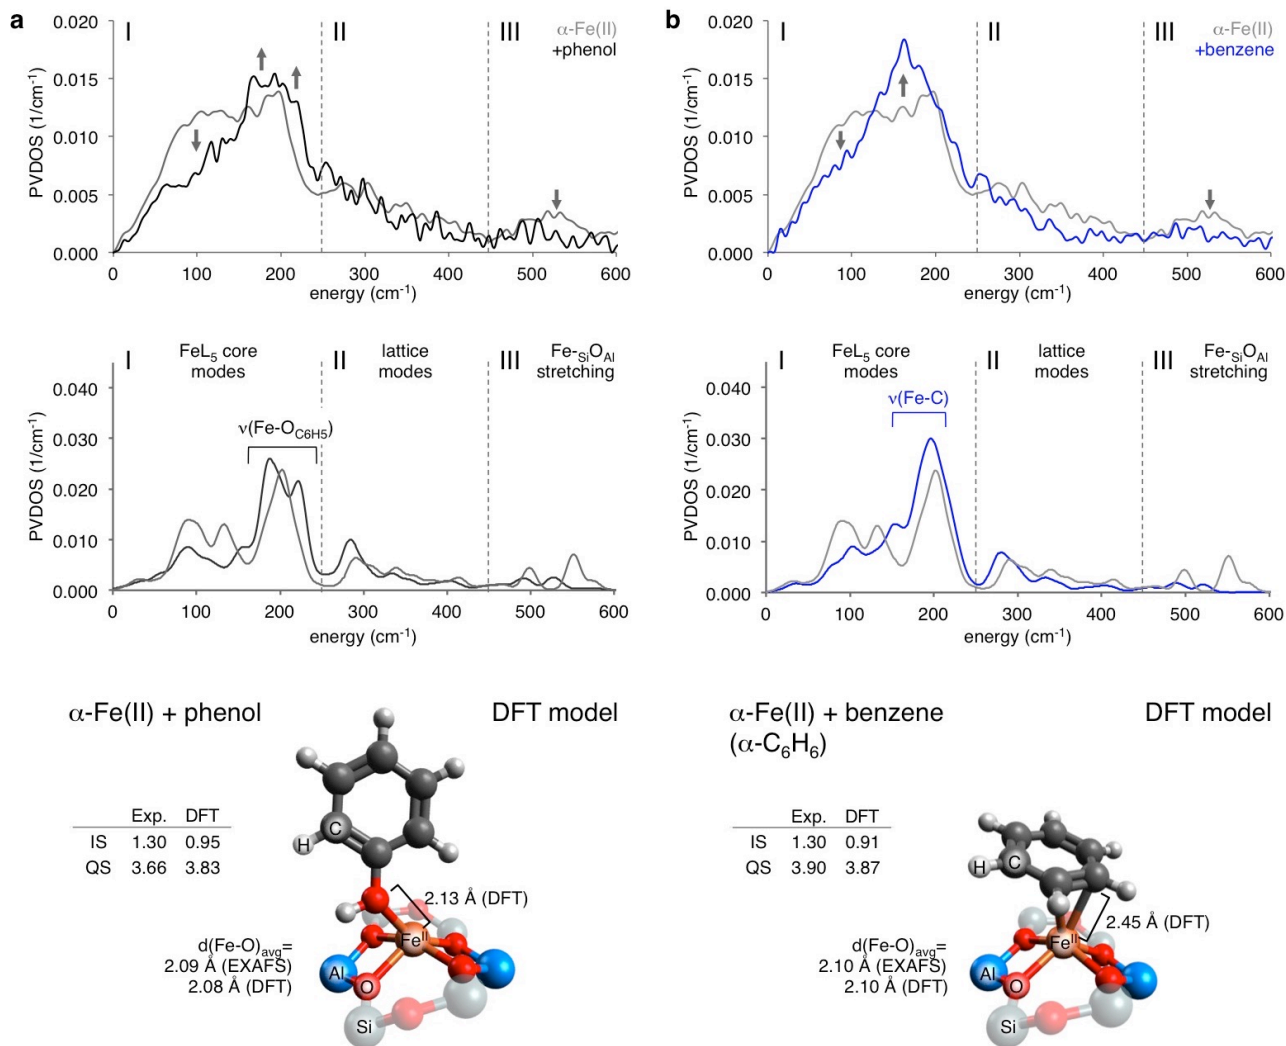

**Figure S3.** **a**, comparison of experimental (top) and simulated NRVS spectra (middle) from  $\alpha$ -Fe(II) (gray trace) and phenol-ligated  $\alpha$ -Fe(II) (black trace). Key spectral changes are indicated with arrows. From past studies, the NRVS intensity lost at ca.  $100 \text{ cm}^{-1}$  in  $\alpha$ -Fe(II) corresponds to out-of-plane translation of the Fe center. In the presence of an axial ligand, OOP Fe motion is transferred into the new Fe-L stretching mode at higher frequency. This leads to additional intensity in the  $175\text{-}250 \text{ cm}^{-1}$  region in the experimental and simulated data associated with the Fe-O stretch of the phenol ligand. The DFT model of phenol-ligated  $\alpha$ -Fe(II) used to simulate NRVS data is presented below (atoms have been omitted for clarity). Predicted bond lengths and MB parameters are compared to experimental data. **b**, comparison of experimental (top) and simulated NRVS spectra (middle) from  $\alpha$ -Fe(II) (gray trace) and benzene-ligated  $\alpha$ -Fe(II) (blue trace). Simulations indicate the additional intensity in the  $125\text{-}200 \text{ cm}^{-1}$  region of the benzene-ligated spectrum is related to the Fe-C stretching mode of the weakly bound  $\pi$ - $\eta^2$ -C<sub>6</sub>H<sub>6</sub> ligand. The DFT model of benzene-ligated  $\alpha$ -Fe(II) used to simulate NRVS data is presented below, with predicted bond lengths and MB parameters are compared to experimental data.



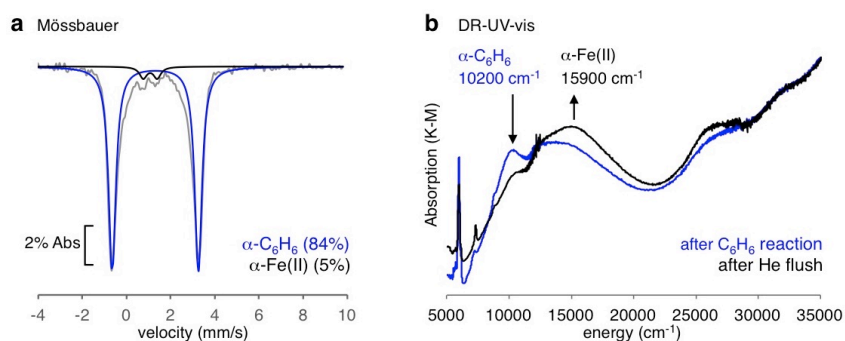

**Figure S4.** **a**, 6K Mössbauer spectrum of Fe(II)-BEA with  $C_6H_6$  adsorbed (gray trace – reproduced from figure 1b), showing an equilibrium between  $\alpha-C_6H_6$  (blue component, 84%) and  $\alpha-Fe(II)$  (black component) in the presence of excess benzene. **b**, 300K DR-UV-vis data from  $N_2O$  activated Fe-BEA after reacting with  $C_6H_6$  at room temperature (blue trace), and subsequent flush with He. As benzene desorbs from  $\alpha-C_6H_6$ , the band at  $10,200\text{ cm}^{-1}$  decays, while the  $15900\text{ cm}^{-1}$  band of  $\alpha-Fe(II)$  grows in. The  $10,200\text{ cm}^{-1}$  feature is therefore assigned as an S=2 Fe(II) ligand field band of  $\alpha-C_6H_6$ . The  $15,900\text{ cm}^{-1}$  band of pure  $\alpha-Fe(II)$  is ca. 50% as intense as the  $14,400\text{ cm}^{-1}$  band of the Fe(III)-phenolate impurity. Using the phenolate band as an internal standard leads to an estimate of 25-50% recovery of  $\alpha-Fe(II)$  following the He flush.

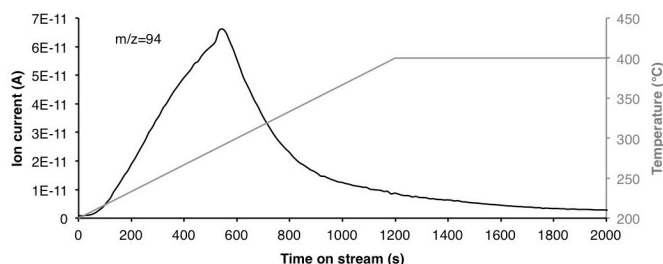

**Figure S5.** Temperature programmed desorption of phenol ( $m/z=94$ ) from Fe-BEA, produced by the reaction of  $C_6H_6$  with  $\alpha-O$  at room temperature. The experiment was performed in a 20 ml/min (at STP) flow of He, using a heating ramp of  $10\text{ }^\circ\text{C}/\text{min}$  from 200-400  $^\circ\text{C}$ .

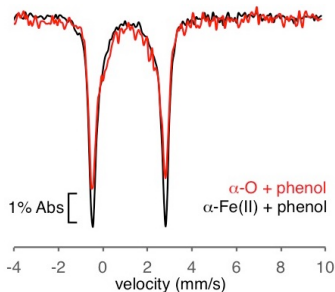

**Figure S6.** Comparison of 300K  $^{57}\text{Fe}$  Mössbauer spectra from the room temperature reaction of phenol vapor with  $\alpha-O$  (red trace) and phenol-ligated  $\alpha-Fe(II)$  (black trace) in Fe-BEA.

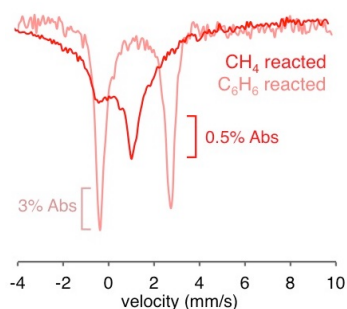

**Figure S7.** Comparison of 300K  $^{57}\text{Fe}$  Mössbauer spectra from  $\alpha\text{-O}$  (BEA) reacted at room temperature with  $\text{CH}_4$  (red trace, 50%  $^{57}\text{Fe}$  enrichment, reproduced from ref 9) and  $\text{C}_6\text{H}_6$  (pink trace, 100%  $^{57}\text{Fe}$  enrichment). While the  $\text{C}_6\text{H}_6$  reacted results in clean regeneration of the Fe(II) active site, the  $\text{CH}_4$  reaction results in significant heterogeneity (including some ferric iron).

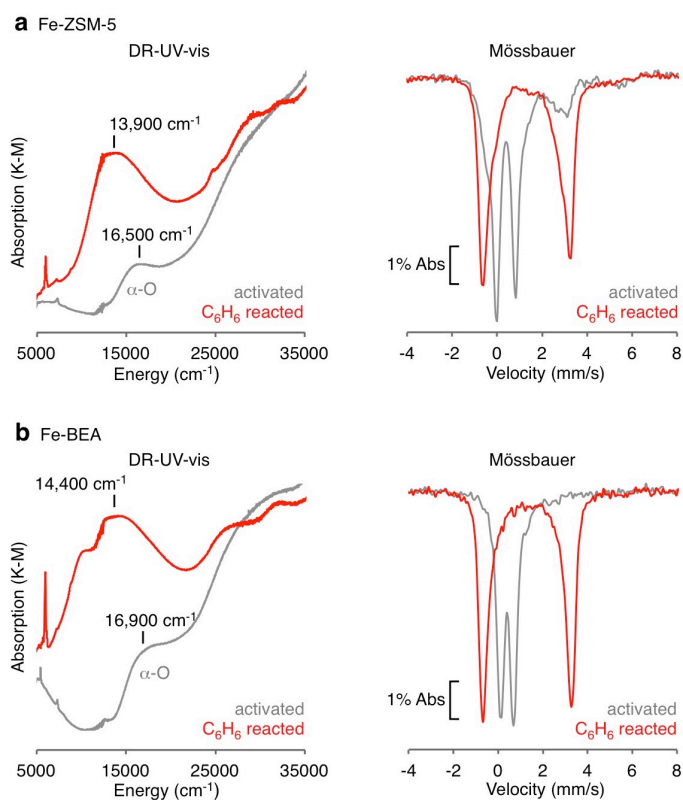

**Figure S8.** Comparison of spectroscopic data tracking the reaction of  $\alpha\text{-O}$  (gray traces) with benzene (red traces) in Fe-ZSM-5 (**a**) and Fe-BEA (**b**). In DR-UV-vis spectroscopy (left), there is an absorption feature that appears at ca.  $14,000\text{ cm}^{-1}$  in both Fe-BEA and Fe-ZSM-5 following reaction with  $\text{C}_6\text{H}_6$ . The 6K  $^{57}\text{Fe}$  Mössbauer spectroscopy of the  $\text{C}_6\text{H}_6$  reaction (right) is similar for Fe-BEA and Fe-ZSM-5, with reduction of  $\alpha\text{-O}$  to form a new S=2 Fe(II) species with a large quadrupole splitting ( $\alpha\text{-C}_6\text{H}_6$ ).

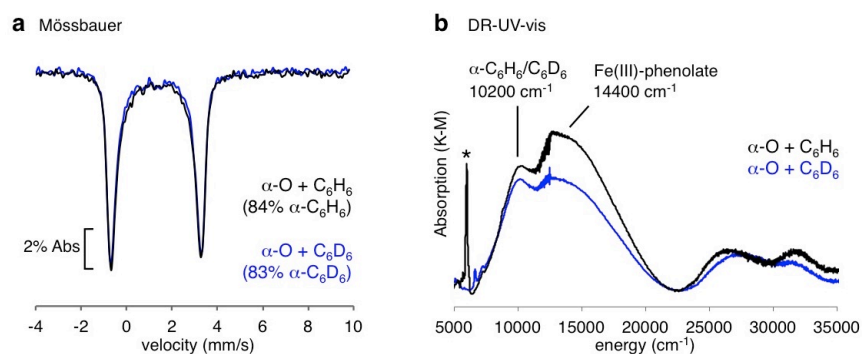

**Figure S9.** **a**, comparison of 6K  $^{57}\text{Fe}$  Mössbauer spectra from  $\alpha\text{-O}$  (BEA) reacted at room temperature with  $\text{C}_6\text{H}_6$  (black trace) and  $\text{C}_6\text{D}_6$  (blue trace), showing the same quantities of  $\alpha\text{-C}_6\text{H}_6/\text{C}_6\text{D}_6$  form. **b**, comparison of parallel DR-UV-vis data showing a 25-35% decrease in the 14,400  $\text{cm}^{-1}$  ferric phenolate charge transfer band upon substrate deuteration. The 10,200  $\text{cm}^{-1}$  ligand field band of  $\alpha\text{-C}_6\text{H}_6/\text{C}_6\text{D}_6$  remains constant, and serves as an internal standard for this comparison. The starred peak is a vibrational overtone of  $\text{C}_6\text{H}_6$  that shifts below 5000  $\text{cm}^{-1}$  for  $\text{C}_6\text{D}_6$ .

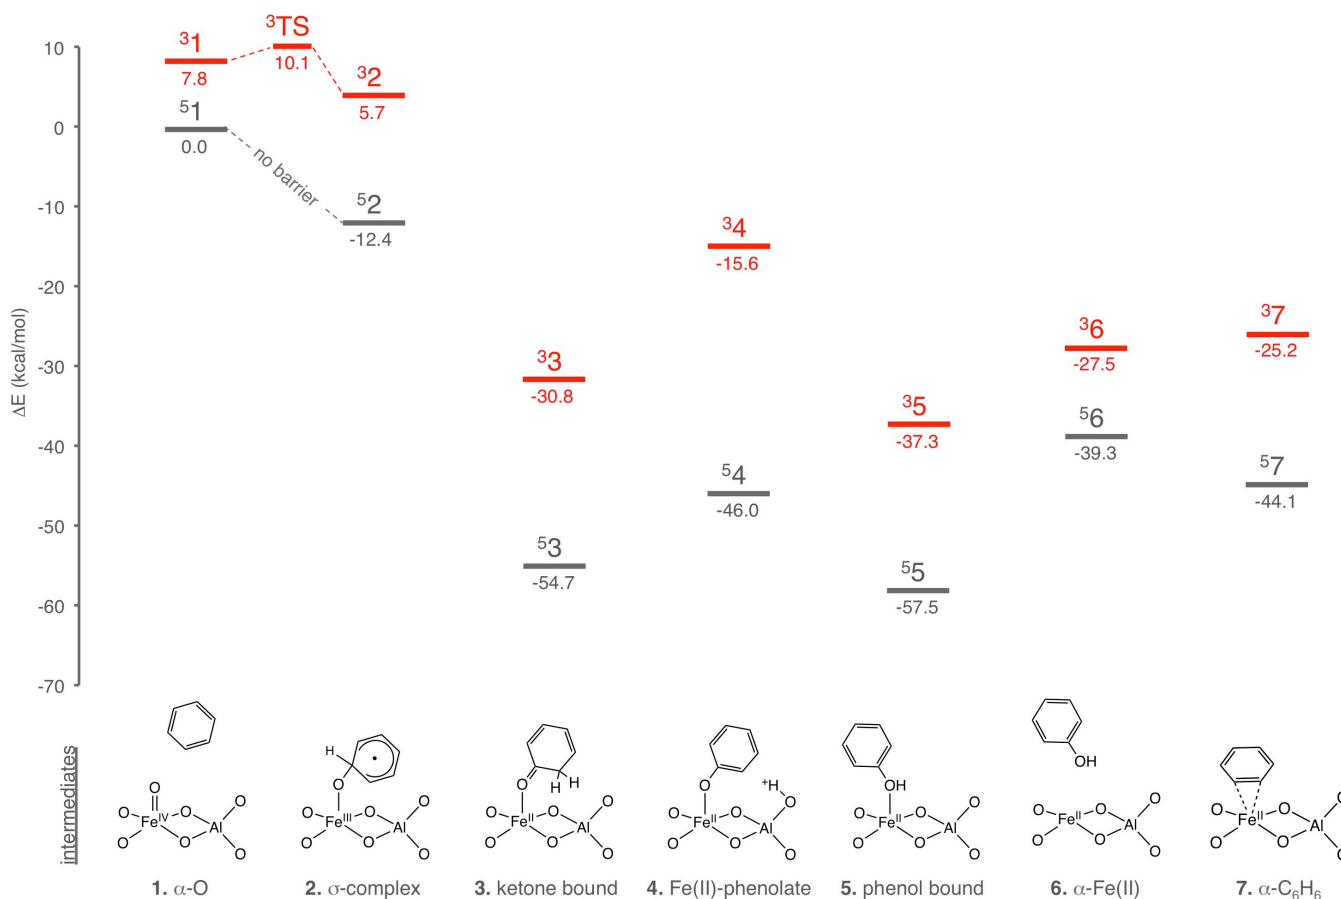

**Figure S10.** Intermediates in benzene hydroxylation by  $\alpha\text{-O}$ , and their relative energies ( $\Delta E$ ) on the quintet (gray) and triplet surfaces (red). For this reaction coordinate, the triplet surface is well separated from the lower energy quintet surface, and it does not contribute to reactivity. There is a small 2.3 kcal/mol barrier for C-O bond formation on the triplet surface due to the loss of  $\sim 10$  kcal/mol of driving force for this reaction (relative to the quintet surface).

## Supplementary Tables

**Table S1 – Coordinates of C<sub>6</sub>H<sub>6</sub>-ligated  $\alpha$ -Fe(II) (DFT NRVS model)**

| element | constrained during optimization? | X           | Y           | Z           |
|---------|----------------------------------|-------------|-------------|-------------|
| Fe      | N                                | 0.02976407  | -0.83328513 | -2.55127621 |
| O       | N                                | 1.12515416  | -1.92036418 | -1.10626438 |
| O       | N                                | -1.09775000 | 0.90019107  | -2.10948315 |
| O       | N                                | -1.73626074 | -1.59177572 | -1.72045657 |
| O       | N                                | 1.75071755  | 0.33966302  | -2.25752137 |
| O       | Y                                | 2.71475794  | -5.34071911 | 4.59728148  |
| O       | Y                                | 2.77363525  | -6.80535193 | 0.28574311  |
| O       | Y                                | 1.78284797  | -3.06103960 | 3.67563759  |
| O       | Y                                | -1.84372180 | 4.70759209  | 1.03080376  |
| O       | Y                                | 4.36851088  | -3.51173810 | 3.68473657  |
| O       | Y                                | 5.86961330  | 0.99152132  | 4.17266020  |
| O       | Y                                | -6.08067231 | 3.23019283  | 1.63972262  |
| O       | Y                                | -5.95757500 | 1.75996687  | 3.81638330  |
| O       | Y                                | 6.01763540  | -1.49497490 | 3.33007697  |
| O       | Y                                | 2.81232683  | -4.82660859 | 2.02051334  |
| O       | Y                                | -2.83971040 | 5.10794899  | -1.37009164 |
| O       | Y                                | 3.59255598  | 1.40609396  | -6.78601770 |
| O       | N                                | 1.85936514  | -4.44019732 | -0.45227956 |
| O       | Y                                | -3.52032342 | -5.18512650 | -4.62609039 |
| O       | N                                | -1.85025424 | 3.31222908  | -3.08356230 |
| O       | Y                                | 4.39957402  | -4.77826601 | -0.07791726 |
| O       | Y                                | 2.70469567  | 4.07847649  | 3.08081404  |
| O       | Y                                | -6.02183378 | 1.76556210  | -2.67181836 |
| O       | Y                                | -2.79225362 | -1.34310754 | 4.86033748  |
| O       | Y                                | 6.03004169  | -2.93570026 | -0.98990540 |
| O       | Y                                | 5.98218952  | -1.53387373 | -3.21088440 |
| O       | Y                                | -0.63986327 | -2.03802053 | 3.52445458  |
| O       | Y                                | -5.94806023 | -0.69363455 | -3.59217902 |
| O       | Y                                | 0.57584351  | 3.81348903  | 1.56487304  |
| O       | Y                                | 4.82158362  | 0.18528338  | -4.81582306 |
| O       | N                                | 0.49267004  | -2.98109228 | 1.32463353  |
| O       | Y                                | -4.77151190 | -3.02755202 | -3.81399938 |
| O       | N                                | -0.52103021 | 3.21557285  | -0.77138345 |
| O       | Y                                | 1.39567939  | -0.77373735 | 2.42946002  |
| O       | Y                                | -1.44957340 | 2.13430395  | 1.42721465  |
| O       | N                                | 2.64494975  | 1.61663016  | -4.38689176 |
| O       | N                                | -0.62301904 | -3.88040899 | -0.92751843 |

|    |   |             |             |             |
|----|---|-------------|-------------|-------------|
| O  | N | -2.60690150 | -3.94500749 | -2.56788887 |
| O  | N | 0.64135803  | 2.61042011  | -3.09825644 |
| O  | Y | 4.92571671  | 2.81411853  | -5.00834963 |
| O  | Y | -4.88678205 | -5.23822500 | -2.37889625 |
| O  | Y | 5.00180533  | 4.25415307  | -1.06188504 |
| O  | Y | 6.12573207  | -0.31537261 | -0.88882727 |
| O  | Y | -2.14940850 | -0.07144170 | 2.65703026  |
| O  | Y | -6.13208220 | -0.26083308 | -1.00836888 |
| O  | Y | 2.08831216  | 1.73020874  | 2.08562294  |
| O  | Y | 4.75300349  | 1.80349167  | -0.16176859 |
| O  | N | -2.80706122 | 0.33526797  | 0.16572002  |
| O  | Y | -4.78087976 | -1.50199157 | 0.87215829  |
| O  | N | 2.82787605  | -0.11603839 | 0.37627066  |
| O  | Y | 6.18487319  | 0.48746191  | 1.61252793  |
| O  | Y | -3.95591414 | 1.75732860  | 2.11311562  |
| O  | Y | -6.23231112 | 0.61187787  | 1.46815789  |
| O  | Y | 3.89348390  | -0.04615382 | 2.78499103  |
| O  | N | 3.04435853  | 2.72730865  | -1.98676978 |
| O  | N | -3.03988388 | -3.28906960 | -0.01014022 |
| O  | Y | 2.98078470  | 3.63063324  | 0.50261724  |
| O  | N | -3.90048064 | 0.26287342  | -2.45025441 |
| O  | Y | -3.02783079 | -2.54669512 | 2.53229061  |
| O  | N | 3.91154616  | -1.60838811 | -1.77890915 |
| Si | Y | 2.91986834  | -4.18779827 | 3.49248818  |
| Si | Y | -2.97224891 | 5.48863548  | 0.18678183  |
| Si | Y | 2.94902881  | -5.21538753 | 0.46504276  |
| Si | Y | -2.95138453 | 4.47636953  | -2.84588257 |
| Si | Y | 0.76419793  | -2.21639709 | 2.75907062  |
| Si | Y | -0.81577086 | 3.48574220  | 0.82668706  |
| Si | Y | 4.01065973  | 1.51249540  | -5.23460620 |
| Si | N | 0.73538276  | -3.27408214 | -0.25808906 |
| Si | Y | -3.96267787 | -4.33404446 | -3.33241755 |
| Si | N | -0.73202231 | 2.50432408  | -2.22116291 |
| Si | Y | -2.61544365 | 1.03728508  | 1.58640170  |
| Si | Y | 2.56448027  | 0.20202185  | 1.91034480  |
| Si | Y | 3.94736810  | 3.10022917  | -0.67031952 |
| Al | N | -2.53489038 | 0.00961722  | -1.47258608 |
| Si | Y | -3.97424121 | -2.83830113 | 1.26319596  |
| Al | N | 2.55029763  | -0.81659357 | -1.13044603 |
| Si | Y | 5.50465949  | -1.57666553 | -1.67292620 |
| Si | Y | -2.15379486 | -1.50351885 | 3.39218244  |
| Si | Y | -5.49317105 | 0.27275001  | -2.38622691 |
| Si | Y | 2.08884936  | 3.31532113  | 1.80516335  |

|    |   |             |             |             |
|----|---|-------------|-------------|-------------|
| Si | N | 2.05400956  | 1.82939199  | -2.88545231 |
| Si | N | -2.03773255 | -3.14768472 | -1.26849029 |
| Si | Y | 5.49097111  | -0.01542943 | 2.97427329  |
| Si | Y | -5.55617701 | 1.83923852  | 2.25883715  |
| O  | Y | -5.02852955 | -3.99939188 | 1.63343758  |
| O  | Y | -4.42693441 | 5.05917530  | 0.72718642  |
| O  | Y | -2.77779613 | 7.07593724  | 0.37251800  |
| O  | Y | -4.39590433 | 3.79269757  | -3.03547918 |
| O  | Y | -2.76542959 | 5.63522064  | -3.94743848 |
| O  | Y | 4.97138748  | 3.46090863  | 4.26707078  |
| O  | Y | -5.07318367 | -0.14527623 | 5.39799816  |
| O  | Y | 3.49376636  | 5.43578337  | 5.18559316  |
| O  | Y | -3.61921628 | -1.15545797 | 7.34548992  |
| O  | Y | 4.76042701  | 5.69894681  | 2.89888677  |
| Si | Y | 3.98565317  | 4.66542580  | 3.85883324  |
| Si | Y | -4.08751905 | -1.34657486 | 5.81581778  |
| O  | Y | -4.85312042 | -2.75403402 | 5.66479392  |
| H  | Y | 3.39909062  | -6.01932480 | 4.48728625  |
| H  | Y | 3.45789246  | -7.26581064 | 0.79625625  |
| H  | Y | 5.05711096  | -4.18611257 | 3.57547870  |
| H  | Y | 6.83266562  | 1.01037074  | 4.28701442  |
| H  | Y | -7.04541446 | 3.27981107  | 1.72751855  |
| H  | Y | -6.92229105 | 1.80929182  | 3.90457000  |
| H  | Y | 6.98071005  | -1.47660148 | 3.44429508  |
| H  | Y | 4.39142540  | 1.34384379  | -7.33271918 |
| H  | Y | -4.31072931 | -5.46990027 | -5.11108196 |
| H  | Y | 5.08687677  | -5.23417295 | 0.43257565  |
| H  | Y | -6.98918281 | 1.75802648  | -2.74289007 |
| H  | Y | 6.99835890  | -2.96784463 | -1.03672114 |
| H  | Y | 6.95072443  | -1.56918764 | -3.24994016 |
| H  | Y | -6.91571729 | -0.69396236 | -3.65899665 |
| H  | Y | 5.61983026  | 0.10895317  | -5.36080890 |
| H  | Y | -5.56228615 | -3.30001685 | -4.30534380 |
| H  | Y | 5.72058625  | 2.75074606  | -5.56064375 |
| H  | Y | -5.67297612 | -5.52579044 | -2.86887546 |
| H  | Y | 4.52258477  | 5.03934037  | -1.36957249 |
| H  | Y | 7.09396224  | -0.35094907 | -0.93441769 |
| H  | Y | -7.09934688 | -0.26486889 | -1.08052473 |
| H  | Y | 5.70598328  | 1.98125558  | -0.19509848 |
| H  | Y | -5.73413228 | -1.66837127 | 0.93935985  |
| H  | Y | 7.14781369  | 0.50571744  | 1.72791357  |
| H  | Y | -7.19693785 | 0.66230105  | 1.55680639  |
| H  | Y | -4.54873284 | -4.80841625 | 1.87027868  |

|   |   |             |             |             |
|---|---|-------------|-------------|-------------|
| H | Y | -5.11047331 | 5.52679027  | 0.22220795  |
| H | Y | -3.45702652 | 7.54650975  | -0.13553540 |
| H | Y | -5.08840034 | 4.46104946  | -2.91480844 |
| H | Y | -3.45487489 | 6.30723304  | -3.82946034 |
| H | Y | 5.74190098  | 3.81831744  | 4.73555575  |
| H | Y | -5.85232625 | -0.15052353 | 5.97575393  |
| H | Y | 4.26333502  | 5.79102651  | 5.65726453  |
| H | Y | -4.39745707 | -1.15704404 | 7.92448339  |
| H | Y | 5.53342144  | 6.05512776  | 3.36419815  |
| H | Y | -5.63469639 | -2.76023054 | 6.23925340  |
| H | N | 0.01711038  | -4.79705608 | -4.53461130 |
| H | N | -1.90965875 | -3.45066681 | -5.29077771 |
| C | N | 0.13107109  | -3.72581639 | -4.65013629 |
| C | N | -0.96603976 | -2.96136821 | -5.05981658 |
| C | N | 1.35075093  | -3.11678010 | -4.35371079 |
| C | N | -0.84002658 | -1.57919666 | -5.16767194 |
| H | N | 2.18871041  | -3.70134886 | -3.99483178 |
| H | N | -1.69674690 | -0.97324683 | -5.43311245 |
| C | N | 1.49206718  | -1.73137610 | -4.48846937 |
| C | N | 0.38925705  | -0.95344237 | -4.89055516 |
| H | N | 0.51669879  | 0.10433845  | -5.09743726 |
| H | N | 2.44902584  | -1.26638359 | -4.27278500 |

**Table S2 – Coordinates of phenol-ligated  $\alpha$ -Fe(II) (DFT NRVS model)**

| element | constrained during optimization? | X           | Y           | Z           |
|---------|----------------------------------|-------------|-------------|-------------|
| Fe      | N                                | 0.17446788  | -1.89066403 | -1.53326630 |
| O       | N                                | -1.04439226 | -0.41704573 | -2.26376349 |
| O       | N                                | 1.25153440  | -2.05089318 | 0.21068544  |
| O       | N                                | 1.85840615  | -0.77663718 | -1.99862375 |
| O       | N                                | -1.65491085 | -2.30603552 | -0.53933625 |
| O       | Y                                | -3.17620710 | 5.93942983  | -3.69835874 |
| O       | Y                                | -2.77834085 | 2.36214057  | -6.48810366 |
| O       | Y                                | -2.18317631 | 4.41015372  | -1.80361268 |
| O       | Y                                | 1.59884944  | -0.29358977 | 4.83491166  |
| O       | Y                                | -4.75067242 | 4.32854865  | -2.34228406 |
| O       | Y                                | -6.34830149 | 3.16983165  | 2.00233190  |
| O       | Y                                | 5.76954567  | 1.15437058  | 3.82787527  |
| O       | Y                                | 5.44354815  | 3.67202955  | 3.14253206  |

|   |   |             |             |             |
|---|---|-------------|-------------|-------------|
| O | Y | -6.37957634 | 3.18084219  | -0.62700806 |
| O | Y | -3.01737033 | 3.33937364  | -4.05618813 |
| O | Y | 2.82897047  | -2.59020713 | 4.47594272  |
| O | Y | -2.97348318 | -7.05797855 | -1.07212662 |
| O | N | -1.82287377 | 0.97808151  | -4.44979001 |
| O | Y | 3.96259112  | -2.20752516 | -6.27487560 |
| O | N | 2.03094664  | -3.71764171 | 2.18537036  |
| O | Y | -4.38338729 | 1.20471975  | -4.76496940 |
| O | Y | -3.12651869 | 1.42111130  | 4.70422724  |
| O | Y | 6.16742277  | -2.42296850 | 1.03812136  |
| O | Y | 2.22643182  | 5.38098770  | 0.40980119  |
| O | Y | -5.93490044 | -0.40795264 | -3.39483795 |
| O | Y | -5.67841659 | -2.95174682 | -2.79189512 |
| O | Y | 0.22973838  | 4.15517908  | -0.77800867 |
| O | Y | 6.21760756  | -2.48715819 | -1.58741862 |
| O | Y | -0.85143147 | 0.27922365  | 4.05584606  |
| O | Y | -4.38084407 | -4.91832792 | -1.63895249 |
| O | N | -0.67063016 | 2.28438296  | -2.42883934 |
| O | Y | 5.09837223  | -2.03732089 | -3.91666858 |
| O | N | 0.48548443  | -1.62548028 | 2.79351783  |
| O | Y | -1.69908883 | 2.52314605  | -0.03174721 |
| O | Y | 1.19759004  | 0.88775024  | 2.51563467  |
| O | N | -2.24593229 | -4.80526695 | -0.07770247 |
| O | N | 0.69463831  | 0.58450479  | -3.96344707 |
| O | N | 2.82959889  | -0.77861011 | -4.45492112 |
| O | N | -0.43776544 | -3.69074445 | 1.38457158  |
| O | Y | -4.49753045 | -5.97221696 | 0.77666177  |
| O | Y | 5.09375703  | 0.04825018  | -5.53217115 |
| O | Y | -4.99225109 | -2.74247370 | 3.41817566  |
| O | Y | -6.07226210 | -1.18236530 | -0.89147707 |
| O | Y | 1.79545330  | 2.83273358  | 0.86435375  |
| O | Y | 6.13250422  | -0.18350473 | -0.32904916 |
| O | Y | -2.38352575 | 1.31360821  | 2.19000460  |
| O | Y | -4.80649439 | -1.06843648 | 1.40798171  |
| O | N | 2.71473748  | 0.42919714  | 0.47100987  |
| O | Y | 4.61223973  | 1.86739256  | -0.94961681 |
| O | N | -2.89523002 | 0.23286739  | -0.12614753 |
| O | Y | -6.39532381 | 0.89977594  | 0.67855502  |
| O | Y | 3.62568370  | 1.88791198  | 2.49552793  |
| O | Y | 5.96969490  | 1.86705141  | 1.30596415  |
| O | Y | -4.22878016 | 2.38825200  | 0.65913844  |
| O | N | -2.95433818 | -2.96289938 | 1.76929435  |
| O | N | 3.00043257  | 1.47917477  | -3.02518372 |



|    |   |             |             |             |
|----|---|-------------|-------------|-------------|
| O  | Y | -3.13349312 | -0.88072506 | 3.42942031  |
| O  | N | 4.05565018  | -1.92405475 | -0.40971186 |
| O  | Y | 2.71232163  | 3.60963807  | -1.47430711 |
| O  | N | -3.77012719 | -1.35461191 | -2.32331223 |
| Si | Y | -3.28186714 | 4.50333469  | -2.97841506 |
| Si | Y | 2.79781859  | -1.23954128 | 5.34834545  |
| Si | Y | -2.99039466 | 1.99227171  | -4.93597033 |
| Si | Y | 3.09792969  | -3.75974656 | 3.40392703  |
| Si | Y | -1.08692845 | 3.36498866  | -1.25864745 |
| Si | Y | 0.61203174  | -0.17866483 | 3.56851780  |
| Si | Y | -3.54837373 | -5.67300310 | -0.48551979 |
| Si | N | -0.73602134 | 0.88080916  | -3.24817347 |
| Si | Y | 4.25981971  | -1.23067458 | -5.02976275 |
| Si | N | 0.85351508  | -2.73190013 | 1.65893421  |
| Si | Y | 2.35483277  | 1.50510085  | 1.58455967  |
| Si | Y | -2.82087414 | 1.60717429  | 0.66823171  |
| Si | Y | -3.96911915 | -1.89818136 | 2.50335879  |
| Al | N | 2.62256910  | -1.02329807 | -0.37600152 |
| Si | Y | 3.78632758  | 2.59972978  | -2.12055889 |
| Al | N | -2.50092836 | -0.91404083 | -1.29465458 |
| Si | Y | -5.35941833 | -1.44802814 | -2.31008249 |
| Si | Y | 1.74269903  | 3.99482879  | -0.24829966 |
| Si | Y | 5.63085826  | -1.71293687 | -0.30261207 |
| Si | Y | -2.37482394 | 0.52936423  | 3.59572631  |
| Si | N | -1.86568374 | -3.39102976 | 0.66503522  |
| Si | N | 2.13160414  | 0.15615659  | -3.32991188 |
| Si | Y | -5.83748727 | 2.40893821  | 0.67810668  |
| Si | Y | 5.20177835  | 2.14467744  | 2.69230841  |
| O  | Y | 4.81156754  | 3.42604068  | -3.04931048 |
| O  | Y | 4.19509507  | -0.45650459 | 5.18395899  |
| O  | Y | 2.56617112  | -1.60421711 | 6.89922517  |
| O  | Y | 4.56240912  | -3.58034852 | 2.76130647  |
| O  | Y | 3.01086560  | -5.19300167 | 4.13139623  |
| O  | Y | -5.49444960 | 2.53025158  | 4.40555435  |
| O  | Y | 4.42608965  | 5.70308646  | 1.81844805  |
| O  | Y | -4.14207296 | 2.88114797  | 6.63605532  |
| O  | Y | 2.79394161  | 7.73162315  | 1.43328327  |
| O  | Y | -5.17263994 | 0.52848171  | 6.08323433  |
| Si | Y | -4.48702584 | 1.84168079  | 5.45444047  |
| Si | Y | 3.41772129  | 6.39961390  | 0.77572474  |
| O  | Y | 4.21178132  | 6.79045490  | -0.56837711 |
| H  | Y | -3.83749117 | 5.99588081  | -4.40577019 |
| H  | Y | -3.50531680 | 2.93024616  | -6.78744235 |

|   |   |             |             |             |
|---|---|-------------|-------------|-------------|
| H | Y | -5.41633055 | 4.38391128  | -3.04565274 |
| H | Y | -7.31814902 | 3.18242091  | 2.01417493  |
| H | Y | 6.71967623  | 1.30947377  | 3.94659218  |
| H | Y | 6.39361636  | 3.82759397  | 3.26109803  |
| H | Y | -7.34942642 | 3.19345778  | -0.61565989 |
| H | Y | -3.71171996 | -7.62502098 | -1.34472848 |
| H | Y | 4.80152977  | -2.49686775 | -6.66643348 |
| H | Y | -5.11345655 | 1.77101679  | -5.06015328 |
| H | Y | 7.13703404  | -2.39807657 | 1.05129779  |
| H | Y | -6.89297802 | -0.53061347 | -3.48387465 |
| H | Y | -6.63745584 | -3.06607063 | -2.88143245 |
| H | Y | 7.18698535  | -2.46070030 | -1.56609224 |
| H | Y | -5.11951932 | -5.47859799 | -1.92402267 |
| H | Y | 5.93815260  | -2.33697525 | -4.29849699 |
| H | Y | -5.23127411 | -6.54375342 | 0.50133131  |
| H | Y | 5.92922046  | -0.24544407 | -5.92788022 |
| H | Y | -4.49379162 | -3.24534490 | 4.08116579  |
| H | Y | -7.03032232 | -1.30278780 | -0.98333319 |
| H | Y | 7.10211686  | -0.16092155 | -0.31306262 |
| H | Y | -5.75323373 | -1.24596168 | 1.52226195  |
| H | Y | 5.55567594  | 2.07301939  | -1.04212928 |
| H | Y | -7.36515780 | 0.91354008  | 0.69017802  |
| H | Y | 6.91961410  | 2.02268103  | 1.42571368  |
| H | Y | 4.32000643  | 3.87029400  | -3.75775110 |
| H | Y | 4.92071716  | -1.02181126 | 5.49182393  |
| H | Y | 3.28779237  | -2.17378699 | 7.20869591  |
| H | Y | 5.23085993  | -3.62265850 | 3.46288589  |
| H | Y | 3.67650805  | -5.23929849 | 4.83543647  |
| H | Y | -6.31291662 | 2.78226691  | 4.86108838  |
| H | Y | 5.14242024  | 6.31968474  | 2.03655484  |
| H | Y | -4.95989796 | 3.13695692  | 7.09062382  |
| H | Y | 3.50920473  | 8.34809914  | 1.65521040  |
| H | Y | -5.99323710 | 0.77768853  | 6.53646406  |
| H | Y | 4.93087935  | 7.40449038  | -0.35213098 |
| O | N | -0.00040377 | -3.91367959 | -2.10178957 |
| C | N | 0.98776762  | -4.84609470 | -2.44176540 |
| C | N | 2.23118851  | -4.36045103 | -2.82149536 |
| C | N | 0.71619285  | -6.20781980 | -2.38567117 |
| C | N | 3.23323820  | -5.26784407 | -3.14962011 |
| C | N | 1.72939421  | -7.10285734 | -2.72413742 |
| C | N | 2.98674763  | -6.63875767 | -3.10574227 |
| H | N | 4.20708873  | -4.87862823 | -3.42334139 |
| H | N | 2.43093878  | -3.29641458 | -2.85499698 |

|   |   |             |             |             |
|---|---|-------------|-------------|-------------|
| H | N | -0.80651903 | -4.34542747 | -1.77568704 |
| H | N | -0.26006814 | -6.56461041 | -2.06946969 |
| H | N | 1.52981269  | -8.16843383 | -2.67884169 |
| H | N | 3.77264790  | -7.34298622 | -3.35773751 |

**Table S3 – Coordinates of  $\alpha$ -O (DFT model)**

| element | constrained during optimization? | X           | Y           | Z           |
|---------|----------------------------------|-------------|-------------|-------------|
| Fe      | N                                | -0.00006283 | -0.00007343 | -1.31138065 |
| O       | N                                | 0.63336999  | -1.70659091 | -0.42556902 |
| O       | N                                | -0.63346383 | 1.70660593  | -0.42594743 |
| O       | N                                | -1.87170493 | -0.48518852 | -0.87321511 |
| O       | N                                | 1.87167244  | 0.48513937  | -0.87315073 |
| H       | Y                                | 0.94355851  | -6.91769319 | -0.68460900 |
| H       | Y                                | 0.54696667  | -4.28483304 | 3.58085100  |
| H       | Y                                | -0.54694309 | 4.28542742  | 3.58037449  |
| H       | Y                                | 1.30888285  | -5.80900975 | 1.32275064  |
| H       | Y                                | -1.30876779 | 5.80934075  | 1.32207373  |
| H       | Y                                | 4.40308929  | 2.31090160  | -4.67632700 |
| O       | N                                | 0.69752526  | -4.39221443 | -0.71098174 |
| H       | Y                                | -4.40231907 | -2.31037048 | -4.67632196 |
| O       | N                                | -0.69748543 | 4.39230456  | -0.71151988 |
| H       | Y                                | 2.81517898  | -5.57931619 | -0.42951796 |
| H       | Y                                | -5.10757563 | 3.85504812  | -0.78957785 |
| H       | Y                                | 5.10779116  | -3.85491185 | -0.78892871 |
| H       | Y                                | 5.54491729  | -2.11103979 | -2.25011002 |
| H       | Y                                | -1.26439671 | -2.83935040 | 3.75921702  |
| H       | Y                                | -5.54465899 | 2.11097718  | -2.25055763 |
| H       | Y                                | 1.26439330  | 2.83998040  | 3.75893730  |
| H       | Y                                | 5.02585157  | 0.49727834  | -3.38176291 |
| O       | N                                | -0.41947213 | -3.33468351 | 1.46556856  |
| H       | Y                                | -5.02572098 | -0.49748947 | -3.38195822 |
| O       | N                                | 0.41931338  | 3.33502292  | 1.46512464  |
| O       | Y                                | 0.95037001  | -1.86687530 | 3.20213120  |
| O       | Y                                | -0.95025879 | 1.86731878  | 3.20172419  |
| O       | N                                | 3.25330617  | 2.07127157  | -2.54167365 |
| O       | N                                | -1.55309004 | -3.11421943 | -0.91641735 |
| O       | N                                | -3.25301336 | -2.07214834 | -2.54149609 |
| O       | N                                | 1.55284810  | 3.11394344  | -0.91725467 |
| H       | Y                                | 5.73406005  | 2.63870795  | -2.80278177 |

|    |   |             |             |             |
|----|---|-------------|-------------|-------------|
| H  | Y | -5.73386330 | -2.63874195 | -2.80269722 |
| H  | Y | 5.84776633  | 2.70698483  | 1.47002861  |
| H  | Y | 5.78369667  | -1.79851587 | 0.03207344  |
| H  | Y | -2.30481986 | -0.15876254 | 3.59164902  |
| H  | Y | -5.78354336 | 1.79873017  | 0.03167651  |
| H  | Y | 2.30480392  | 0.15936776  | 3.59172572  |
| H  | Y | 5.01176311  | 0.55170529  | 1.53484934  |
| O  | N | -2.76376123 | 0.96224573  | 1.45705853  |
| H  | Y | -5.01166752 | -0.55132973 | 1.53472523  |
| O  | N | 2.76379009  | -0.96201547 | 1.45706691  |
| H  | Y | -3.37965691 | 1.89285767  | 3.66393380  |
| H  | Y | 3.37967162  | -1.89225460 | 3.66428510  |
| O  | N | 3.83238456  | 2.11821432  | 0.05414741  |
| O  | N | -3.83290418 | -2.11748820 | 0.05390475  |
| H  | Y | 3.88031624  | 2.26541644  | 2.61657103  |
| O  | N | -3.44784084 | 2.01833124  | -1.09033355 |
| H  | Y | -3.88023617 | -2.26492815 | 2.61662869  |
| O  | N | 3.44782763  | -2.01840663 | -1.09010103 |
| Si | Y | 1.44501418  | -5.73048260 | -0.08846717 |
| Si | Y | -1.44496081 | 5.73066691  | -0.08917568 |
| Si | Y | -0.05928853 | -3.11143929 | 3.05926650  |
| Si | Y | 0.05917730  | 3.11201531  | 3.05893203  |
| Si | Y | 4.67264204  | 1.87156608  | -3.35310481 |
| Si | N | -0.14182858 | -3.15241323 | -0.12211135 |
| Si | Y | -4.67240602 | -1.87258915 | -3.35275611 |
| Si | N | 0.14179404  | 3.15248104  | -0.12257652 |
| Si | Y | -2.37060786 | 1.13587498  | 3.01210857  |
| Si | Y | 2.37063171  | -1.13519506 | 3.01212683  |
| Si | Y | 4.66130685  | 1.92673336  | 1.48007791  |
| Al | N | -2.33786355 | 1.13612308  | -0.17744735 |
| Si | Y | -4.66136280 | -1.92636206 | 1.48015108  |
| Al | N | 2.33775480  | -1.13609802 | -0.17740222 |
| Si | Y | 5.02193671  | -2.44968983 | -0.97404320 |
| Si | Y | -5.02197847 | 2.44966830  | -0.97451467 |
| Si | N | 2.67275471  | 1.94767999  | -1.05234578 |
| Si | N | -2.67273402 | -1.94782690 | -1.05213307 |
| H  | Y | -5.84769303 | -2.70662629 | 1.47011429  |
| H  | Y | -2.81504149 | 5.57946833  | -0.43022555 |
| H  | Y | -0.94337355 | 6.91780733  | -0.68540161 |
| O  | N | 0.00050597  | -0.00217628 | -2.90191967 |

**Table S4 – Coordinates of  $\alpha$ -O/C<sub>6</sub>H<sub>6</sub>  $\sigma$ -complex (DFT model)**

| element | constrained during optimization? | X           | Y           | Z           |
|---------|----------------------------------|-------------|-------------|-------------|
| Fe      | N                                | 0.10466047  | -0.16944672 | -0.95395427 |
| O       | N                                | -0.95368300 | 1.55320027  | -0.63989948 |
| O       | N                                | 0.79129818  | -1.41626827 | 0.51633952  |
| O       | N                                | 1.76919214  | 0.81687949  | -0.30309296 |
| O       | N                                | -1.77597705 | -0.88171378 | -0.57414609 |
| H       | Y                                | -2.00390481 | 6.37024599  | -2.38287807 |
| H       | Y                                | -2.05776014 | 5.04080138  | 2.46614220  |
| H       | Y                                | 0.30569274  | -2.85055567 | 5.07125038  |
| H       | Y                                | -2.58372717 | 5.75748297  | -0.21944786 |
| H       | Y                                | 1.71941122  | -4.71341378 | 3.47945586  |
| H       | Y                                | -3.16585326 | -4.06768413 | -4.04146284 |
| O       | N                                | -1.37565933 | 4.02322932  | -1.65129389 |
| H       | Y                                | 4.65981138  | 2.06701753  | -4.06114773 |
| O       | N                                | 1.30734223  | -4.01506810 | 1.05848295  |
| H       | Y                                | -3.66333346 | 4.79388290  | -2.03549208 |
| H       | Y                                | 5.51681639  | -2.63969869 | 1.48225039  |
| H       | Y                                | -5.55096806 | 2.61195816  | -2.22205965 |
| H       | Y                                | -5.42184055 | 0.50330529  | -3.17294117 |
| H       | Y                                | -0.11842296 | 4.08072489  | 3.31435080  |
| H       | Y                                | 5.96204559  | -1.27262635 | -0.33438621 |
| H       | Y                                | -1.70379352 | -1.79991046 | 4.56109123  |
| H       | Y                                | -4.29993848 | -2.14841415 | -3.42433524 |
| O       | N                                | -0.57008237 | 3.78432611  | 0.87310767  |
| H       | Y                                | 5.28499569  | 0.80476039  | -2.22636240 |
| O       | N                                | -0.34902790 | -2.66987013 | 2.64773400  |
| O       | Y                                | -2.00614723 | 2.57570671  | 2.73758157  |
| O       | Y                                | 0.40294473  | -0.57766787 | 4.08254784  |
| O       | N                                | -2.50202395 | -3.07962971 | -1.92099857 |
| O       | N                                | 1.04224572  | 3.21777677  | -1.14942553 |
| O       | N                                | 3.16453821  | 2.17235483  | -2.14723238 |
| O       | N                                | -1.02722371 | -3.30976104 | 0.16754365  |
| H       | Y                                | -4.77386434 | -4.16953136 | -2.36958761 |
| H       | Y                                | 5.53124790  | 3.11983209  | -2.18406717 |
| H       | Y                                | -5.71356137 | -3.17238675 | 1.67974090  |
| H       | Y                                | -6.05423959 | 0.73907671  | -0.95765000 |
| H       | Y                                | 1.33009185  | 1.70974435  | 4.07355331  |
| H       | Y                                | 5.69725858  | -0.35002213 | 1.77315136  |
| H       | Y                                | -3.08649391 | 0.48610113  | 3.48479973  |
| H       | Y                                | -5.24442125 | -0.94902910 | 1.24967448  |

|    |   |             |             |             |
|----|---|-------------|-------------|-------------|
| O  | N | 2.36246892  | 0.18307152  | 2.44161578  |
| H  | Y | 4.29662596  | 2.10089936  | 2.41262935  |
| O  | N | -3.28308700 | 0.92962343  | 1.07081844  |
| H  | Y | 2.66909499  | 0.00176744  | 4.88560740  |
| H  | Y | -4.45399806 | 2.23086523  | 2.80993537  |
| O  | N | -3.59270242 | -2.61344048 | 0.46409695  |
| O  | N | 3.22480239  | 3.00522826  | 0.37826021  |
| H  | Y | -4.10043203 | -2.06973212 | 2.92968041  |
| O  | N | 3.68891385  | -1.31151142 | 0.43401130  |
| H  | Y | 2.72732205  | 3.77067391  | 2.78171535  |
| O  | N | -3.60617849 | 1.12612042  | -1.73790941 |
| Si | Y | -2.42618619 | 5.29765604  | -1.55365327 |
| Si | Y | 2.11668734  | -4.96989597 | 2.14050244  |
| Si | Y | -1.18955258 | 3.91932265  | 2.39617709  |
| Si | Y | -0.35746873 | -1.99380079 | 4.15334662  |
| Si | Y | -3.75420976 | -3.37152765 | -2.95257577 |
| Si | N | -0.48989952 | 3.15340194  | -0.62195009 |
| Si | Y | 4.72782743  | 2.04265007  | -2.64297709 |
| Si | N | 0.19718390  | -2.84694912 | 1.12780322  |
| Si | Y | 1.70464191  | 0.35062749  | 3.90351698  |
| Si | Y | -3.23322561 | 1.55105545  | 2.55703075  |
| Si | Y | -4.68507136 | -2.19395730 | 1.64159225  |
| Al | N | 2.29459630  | -0.45781977 | 0.86774799  |
| Si | Y | 3.75880147  | 3.31804589  | 1.91706100  |
| Al | N | -2.56673776 | 0.74127031  | -0.45958898 |
| Si | Y | -5.21773825 | 1.25231870  | -1.98393873 |
| Si | Y | 5.25629668  | -1.37397798 | 0.89364066  |
| Si | N | -2.26973275 | -2.46111305 | -0.44802428 |
| Si | N | 2.33473164  | 2.30672440  | -0.77345024 |
| H  | Y | 4.79120201  | 4.29141157  | 1.85995275  |
| H  | Y | 3.48789307  | -4.63918802 | 1.97641481  |
| H  | Y | 1.92875719  | -6.34505863 | 1.84053775  |
| O  | N | 0.41888827  | -0.61123097 | -2.61516345 |
| C  | N | 0.70953940  | -1.28631384 | -3.87245147 |
| C  | N | 0.79822921  | -2.76016021 | -3.63477097 |
| C  | N | 1.95275822  | -0.69352051 | -4.45415226 |
| C  | N | 1.95056051  | -3.45700400 | -3.85308553 |
| C  | N | 3.07876609  | -1.43631235 | -4.65842035 |
| C  | N | 3.10630273  | -2.81968242 | -4.36298706 |
| H  | N | 1.98362126  | -4.51965723 | -3.63304030 |
| H  | N | -0.08664646 | -3.24406090 | -3.23544901 |
| H  | N | -0.15951037 | -1.05085854 | -4.50366230 |
| H  | N | 1.93513444  | 0.37051492  | -4.66252725 |

|   |   |            |             |             |
|---|---|------------|-------------|-------------|
| H | N | 3.97062210 | -0.95996723 | -5.05427024 |
| H | N | 4.01485868 | -3.38952691 | -4.52046357 |

**Table S5 – Coordinates of NIH shift transition state (DFT model)**

| element | constrained during optimization? | X           | Y           | Z           |
|---------|----------------------------------|-------------|-------------|-------------|
| Fe      | N                                | 0.15558268  | -0.21104551 | -0.95904982 |
| O       | N                                | 0.96002756  | -1.17581214 | 0.70155131  |
| O       | N                                | -1.19254106 | 1.35791526  | -0.83824165 |
| O       | N                                | -1.63935520 | -1.16993438 | -0.57176285 |
| O       | N                                | 1.62966212  | 1.10972249  | -0.33542589 |
| H       | Y                                | 2.78420336  | -5.71389935 | 2.49447395  |
| H       | Y                                | 0.48403706  | -2.24566942 | 5.31651867  |
| H       | Y                                | -2.97066403 | 4.88923144  | 1.88078215  |
| H       | Y                                | 2.24527520  | -3.99415452 | 3.95876339  |
| H       | Y                                | -3.47885357 | 5.26268441  | -0.87691996 |
| H       | Y                                | 4.42455978  | 2.45192018  | -4.11461376 |
| O       | N                                | 1.83617058  | -3.60806897 | 1.46585707  |
| H       | Y                                | -2.32950480 | -4.83610255 | -3.73601227 |
| O       | N                                | -1.93855782 | 3.63454950  | -2.09295300 |
| H       | Y                                | 4.04721768  | -3.77384092 | 2.51081386  |
| H       | Y                                | -5.81823898 | 1.50993216  | -2.65274299 |
| H       | Y                                | 5.75637747  | -1.52720513 | 1.88617318  |
| H       | Y                                | 6.06381156  | -0.27848337 | -0.04085677 |
| H       | Y                                | -1.64025940 | -1.58388703 | 4.64447414  |
| H       | Y                                | -5.31491188 | -0.62845154 | -3.38844677 |
| H       | Y                                | -0.94540641 | 4.33613102  | 2.87806542  |
| H       | Y                                | 5.15572214  | 1.48041667  | -2.14682987 |
| O       | N                                | -0.08209988 | -2.41922611 | 2.88212842  |
| H       | Y                                | -3.77893213 | -3.07638149 | -3.34470016 |
| O       | N                                | -1.22775968 | 3.74896605  | 0.46748491  |
| O       | Y                                | 0.26739861  | -0.08707221 | 4.11378434  |
| O       | Y                                | -2.54390452 | 2.50006605  | 2.39340210  |
| O       | N                                | 2.84623672  | 2.47268186  | -2.27103330 |
| O       | N                                | -0.52150395 | -3.35205573 | 0.43255243  |
| O       | N                                | -1.93165760 | -3.58961143 | -1.68832026 |
| O       | N                                | 0.54610391  | 3.26600981  | -1.43612549 |
| H       | Y                                | 5.03198500  | 3.79892219  | -2.32356356 |
| H       | Y                                | -3.97658269 | -5.04221850 | -2.11246554 |
| H       | Y                                | 3.93137924  | 5.20133988  | 1.56182905  |
| H       | Y                                | 5.56032545  | 0.77848686  | 1.95723004  |

|    |   |             |             |             |
|----|---|-------------|-------------|-------------|
| H  | Y | -3.31482095 | 0.34099914  | 3.30776597  |
| H  | Y | -6.07778401 | -0.29579719 | -1.22733807 |
| H  | Y | 0.82203943  | 2.30931112  | 3.90968670  |
| H  | Y | 3.76314921  | 3.01971532  | 2.31055006  |
| O  | N | -3.46755161 | 0.52397910  | 0.85760761  |
| H  | Y | -5.11459265 | -1.62186654 | 1.15835378  |
| O  | N | 2.18394967  | 0.82848853  | 2.48156842  |
| H  | Y | -4.90756264 | 1.77322926  | 2.42377507  |
| H  | Y | 2.37461741  | 0.92116883  | 4.92569822  |
| O  | N | 2.67492363  | 3.56681295  | 0.15353434  |
| O  | N | -3.17802875 | -3.07353505 | 0.60544061  |
| H  | Y | 1.93512053  | 4.44140569  | 2.46617072  |
| O  | N | -3.69223005 | 0.42333384  | -1.96360169 |
| H  | Y | -3.88680931 | -2.38482737 | 2.97426246  |
| O  | N | 3.79347889  | -0.61169264 | 0.63596127  |
| Si | Y | 2.73914705  | -4.30480198 | 2.66417737  |
| Si | Y | -3.18964441 | 4.71399992  | -2.15430580 |
| Si | Y | -0.26289530 | -1.59474239 | 4.29927686  |
| Si | Y | -1.93435475 | 3.92074514  | 1.94753998  |
| Si | Y | 4.43025720  | 2.56886765  | -2.69942445 |
| Si | N | 0.55577451  | -2.61916350 | 1.40136156  |
| Si | Y | -3.06962694 | -4.14710581 | -2.73905194 |
| Si | N | -0.98382825 | 2.99949795  | -0.95609924 |
| Si | Y | -3.58461576 | 1.27884023  | 2.27623119  |
| Si | Y | 1.41345804  | 1.01856397  | 3.88498978  |
| Si | Y | 3.06365365  | 4.08367628  | 1.68204968  |
| Al | N | -2.65796225 | 0.31410757  | -0.62671923 |
| Si | Y | -4.38474502 | -2.71914474 | 1.68711861  |
| Al | N | 2.26002533  | 0.04656085  | 0.97312067  |
| Si | Y | 5.32710513  | -0.37933775 | 1.16889454  |
| Si | Y | -5.28626507 | 0.24940378  | -2.27267337 |
| Si | N | 1.94733800  | 2.61574946  | -0.93313851 |
| Si | N | -1.86586441 | -2.78085795 | -0.29293919 |
| H  | Y | -5.24689512 | -3.84291112 | 1.78911555  |
| H  | Y | -4.30849237 | 3.97538058  | -2.62240605 |
| H  | Y | -2.90390169 | 5.76009801  | -3.07103851 |
| O  | N | 0.85235731  | -0.99430555 | -2.44855597 |
| C  | N | 2.05343182  | -1.65964461 | -2.71407830 |
| C  | N | 2.77913243  | -1.11184250 | -3.89357800 |
| C  | N | 1.93576040  | -3.14644657 | -2.70535657 |
| C  | N | 3.44301231  | -1.92251838 | -4.76948919 |
| C  | N | 2.61741718  | -3.92344356 | -3.59926356 |
| C  | N | 3.38147075  | -3.32596621 | -4.62438653 |



|   |   |            |             |             |
|---|---|------------|-------------|-------------|
| H | N | 3.99353158 | -1.49593457 | -5.60135319 |
| H | N | 2.77398126 | -0.03269743 | -3.99796921 |
| H | N | 2.76472990 | -1.46344042 | -1.86597482 |
| H | N | 1.31102480 | -3.58127368 | -1.93274846 |
| H | N | 2.54588852 | -5.00469551 | -3.54814255 |
| H | N | 3.90245492 | -3.95732314 | -5.33631149 |

**Table S6 – Coordinates of 2,4-cyclohexadienone-ligated  $\alpha$ -Fe(II) (DFT model)**

| element | constrained during optimization? | X           | Y           | Z           |
|---------|----------------------------------|-------------|-------------|-------------|
| Fe      | N                                | 0.15298380  | -0.15803609 | -1.00517723 |
| O       | N                                | 1.15110766  | -0.97741020 | 0.66985677  |
| O       | N                                | -1.47204755 | 1.15155076  | -0.82185618 |
| O       | N                                | -1.45609901 | -1.44321635 | -0.62890187 |
| O       | N                                | 1.40150352  | 1.40787049  | -0.38293585 |
| H       | Y                                | 3.76884118  | -5.12755760 | 2.37402279  |
| H       | Y                                | 0.92743853  | -2.14742139 | 5.25994370  |
| H       | Y                                | -3.79976879 | 4.27717477  | 1.93968310  |
| H       | Y                                | 2.95272188  | -3.54251911 | 3.86187753  |
| H       | Y                                | -4.40781304 | 4.57293826  | -0.80721529 |
| H       | Y                                | 3.82176005  | 3.24630599  | -4.17784917 |
| O       | N                                | 2.44554623  | -3.22461643 | 1.37252993  |
| H       | Y                                | -1.51205154 | -5.13622649 | -3.77834211 |
| O       | N                                | -2.61686984 | 3.26229992  | -2.06046371 |
| H       | Y                                | 4.66424149  | -2.99278957 | 2.39198273  |
| H       | Y                                | -6.06389221 | 0.47440018  | -2.58732996 |
| H       | Y                                | 5.93405370  | -0.47197985 | 1.76598683  |
| H       | Y                                | 5.98410281  | 0.82513951  | -0.15293022 |
| H       | Y                                | -1.29082812 | -1.87218041 | 4.62294236  |
| H       | Y                                | -5.19694709 | -1.53399716 | -3.35023847 |
| H       | Y                                | -1.69351923 | 4.08882531  | 2.90425540  |
| H       | Y                                | 4.74439291  | 2.40768114  | -2.22950426 |
| O       | N                                | 0.37278948  | -2.41624695 | 2.84199777  |
| H       | Y                                | -3.24707013 | -3.66741887 | -3.35067681 |
| O       | N                                | -1.90541728 | 3.49376201  | 0.49260766  |
| O       | Y                                | 0.30989261  | -0.05414526 | 4.08101366  |
| O       | Y                                | -2.94457052 | 1.99956153  | 2.42355085  |
| O       | N                                | 2.28895764  | 2.99211912  | -2.31582922 |
| O       | N                                | 0.06361427  | -3.37149595 | 0.37943945  |
| O       | N                                | -1.30492421 | -3.86520354 | -1.72439245 |
| O       | N                                | -0.10070558 | 3.33480795  | -1.43389633 |

|    |   |             |             |             |
|----|---|-------------|-------------|-------------|
| H  | Y | 4.20496307  | 4.66770010  | -2.38228940 |
| H  | Y | -3.07114000 | -5.64548113 | -2.13482266 |
| H  | Y | 2.92934151  | 5.82290314  | 1.53085252  |
| H  | Y | 5.32948727  | 1.76073567  | 1.86180888  |
| H  | Y | -3.30274447 | -0.26905897 | 3.32744010  |
| H  | Y | -5.97462165 | -1.35859501 | -1.17596157 |
| H  | Y | 0.42345327  | 2.40420697  | 3.89248344  |
| H  | Y | 3.16560872  | 3.64122096  | 2.26079145  |
| O  | N | -3.51317141 | -0.10886309 | 0.88663525  |
| H  | Y | -4.75400627 | -2.50741512 | 1.18370653  |
| O  | N | 2.01935604  | 1.20068343  | 2.43746168  |
| H  | Y | -5.13920184 | 0.86086094  | 2.47876204  |
| H  | Y | 2.21448325  | 1.30953700  | 4.87412803  |
| O  | N | 1.96491553  | 4.01258702  | 0.12218666  |
| O  | N | -2.59577485 | -3.59177644 | 0.59252822  |
| H  | Y | 1.11513575  | 4.71130971  | 2.45464914  |
| O  | N | -3.77030270 | -0.21351936 | -1.93574482 |
| H  | Y | -3.38243791 | -3.05084292 | 2.97551342  |
| O  | N | 3.82323104  | 0.06641615  | 0.55216688  |
| Si | Y | 3.47479935  | -3.75055495 | 2.55783749  |
| Si | Y | -4.04419771 | 4.09393767  | -2.09358752 |
| Si | Y | 0.06090608  | -1.63369051 | 4.25914555  |
| Si | Y | -2.60594044 | 3.50955449  | 1.98318283  |
| Si | Y | 3.82760566  | 3.35242465  | -2.76180728 |
| Si | N | 1.00551479  | -2.46930771 | 1.34753291  |
| Si | Y | -2.34855929 | -4.59799097 | -2.76493967 |
| Si | N | -1.55195135 | 2.79658936  | -0.93613590 |
| Si | Y | -3.75147924 | 0.61251253  | 2.30868206  |
| Si | Y | 1.23595158  | 1.24049250  | 3.84743633  |
| Si | Y | 2.27761674  | 4.56705732  | 1.65200827  |
| Al | N | -2.70355681 | -0.14864976 | -0.61691270 |
| Si | Y | -3.83168396 | -3.45989009 | 1.69203932  |
| Al | N | 2.19600973  | 0.46437787  | 0.91259980  |
| Si | Y | 5.29553933  | 0.58543582  | 1.06560524  |
| Si | Y | -5.30922439 | -0.67308126 | -2.22657549 |
| Si | N | 1.40506688  | 2.94903858  | -0.96179539 |
| Si | N | -1.37565549 | -3.05552786 | -0.32502246 |
| H  | Y | -4.47710411 | -4.72061284 | 1.79484023  |
| H  | Y | -5.01961995 | 3.17014726  | -2.55365254 |
| H  | Y | -3.96409509 | 5.18072379  | -3.00399869 |
| O  | N | 1.10268143  | -0.80306591 | -2.63847290 |
| C  | N | 2.14201815  | -1.39683487 | -3.01029041 |
| C  | N | 2.46973109  | -1.47618431 | -4.40570271 |

|   |   |            |             |             |
|---|---|------------|-------------|-------------|
| C | N | 3.06640764 | -2.04174304 | -2.01524856 |
| C | N | 3.59050745 | -2.13448743 | -4.81088600 |
| C | N | 4.25414855 | -2.74199661 | -2.57237311 |
| C | N | 4.50011909 | -2.77925991 | -3.89471780 |
| H | N | 3.81508094 | -2.18117364 | -5.87266173 |
| H | N | 1.79622777 | -1.00019570 | -5.10844717 |
| H | N | 3.39964763 | -1.28344502 | -1.28406016 |
| H | N | 2.48362668 | -2.73537502 | -1.39334289 |
| H | N | 4.92261824 | -3.21813356 | -1.86269162 |
| H | N | 5.37255648 | -3.28666668 | -4.29000794 |
